# Supplementary material
Source: MDPI journal article supplement (https://www.mdpi.com/1424-8247/16/10/1418)
Supplement: s1 [file s1]

Supplement information:

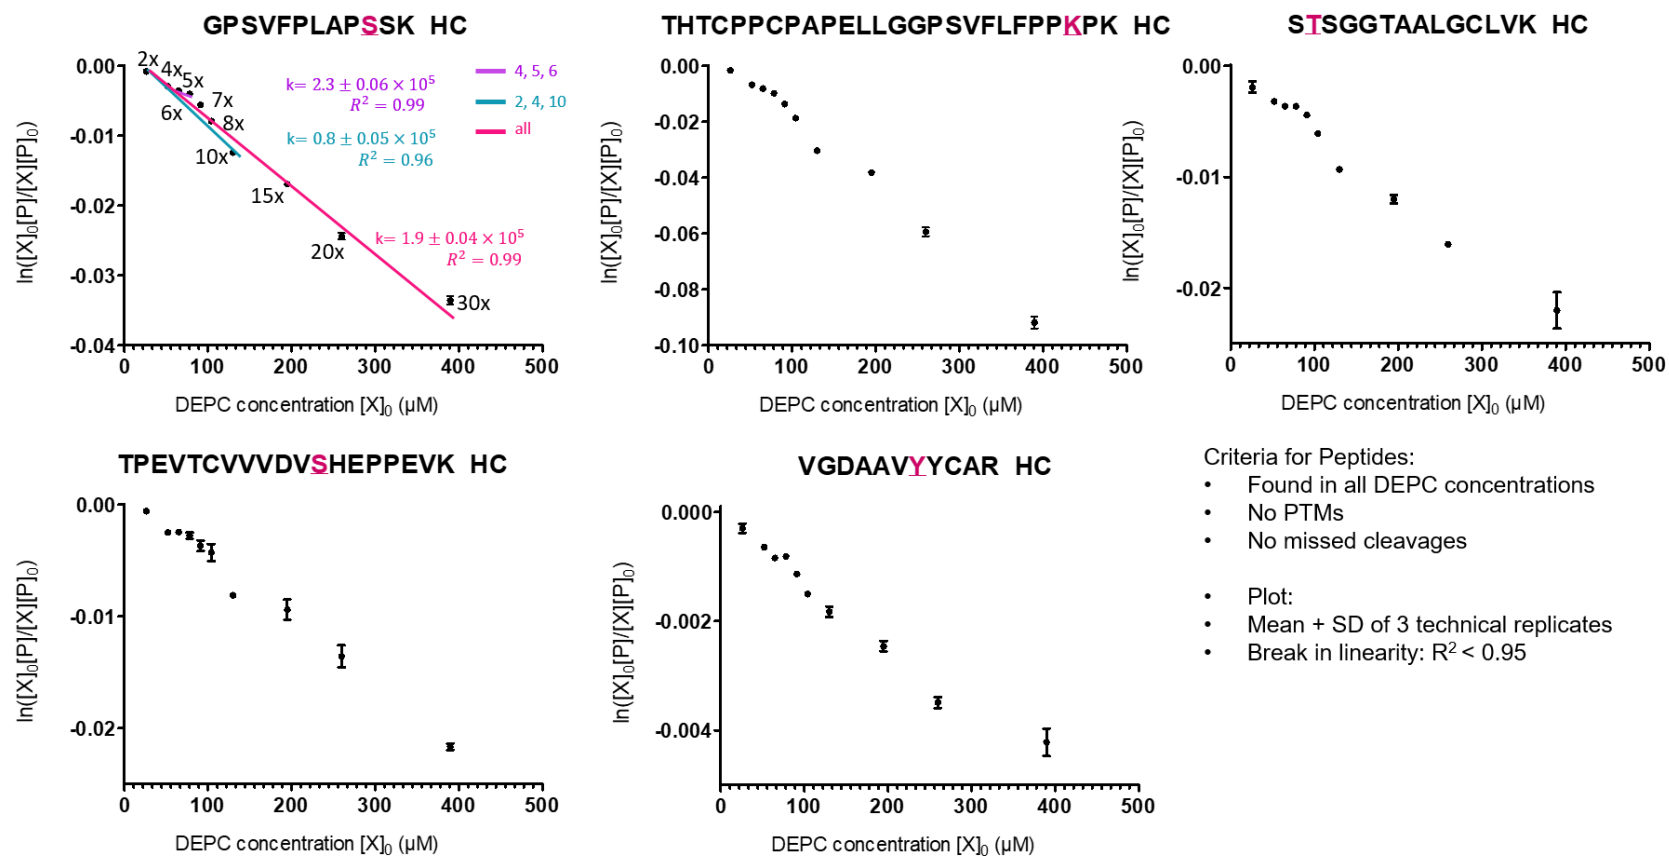

Figure S1: Reaction kinetics of DEPC labelling studied with dose response curve for different peptides of SILuMAb. The X axis is initial concentration of DEPC while Y axis is the ratio of DEPC modified peak area. Criteria for break in linearity was  $R^2 < 0.95$  for the peptides assessed in our CL-MS study. HC signifies heavy chain.

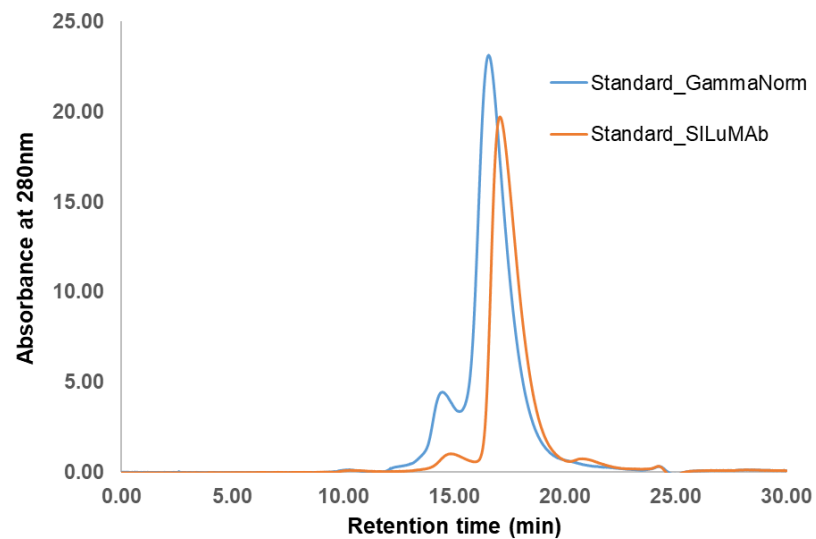

*Figure S2: SEC-UV analysis of standard mAb – GammaNorm in blue and standard SILuMAb in orange. The monomer peak is seen to elute at 17-19 min, while the dimer peak is seen as small peak upfront of monomer at RT of 15 min. The standard SILuMAb also shows a minor fragment peak at 21 min. A small bump at 10 min is a column contamination visible in all samples and blanks.*

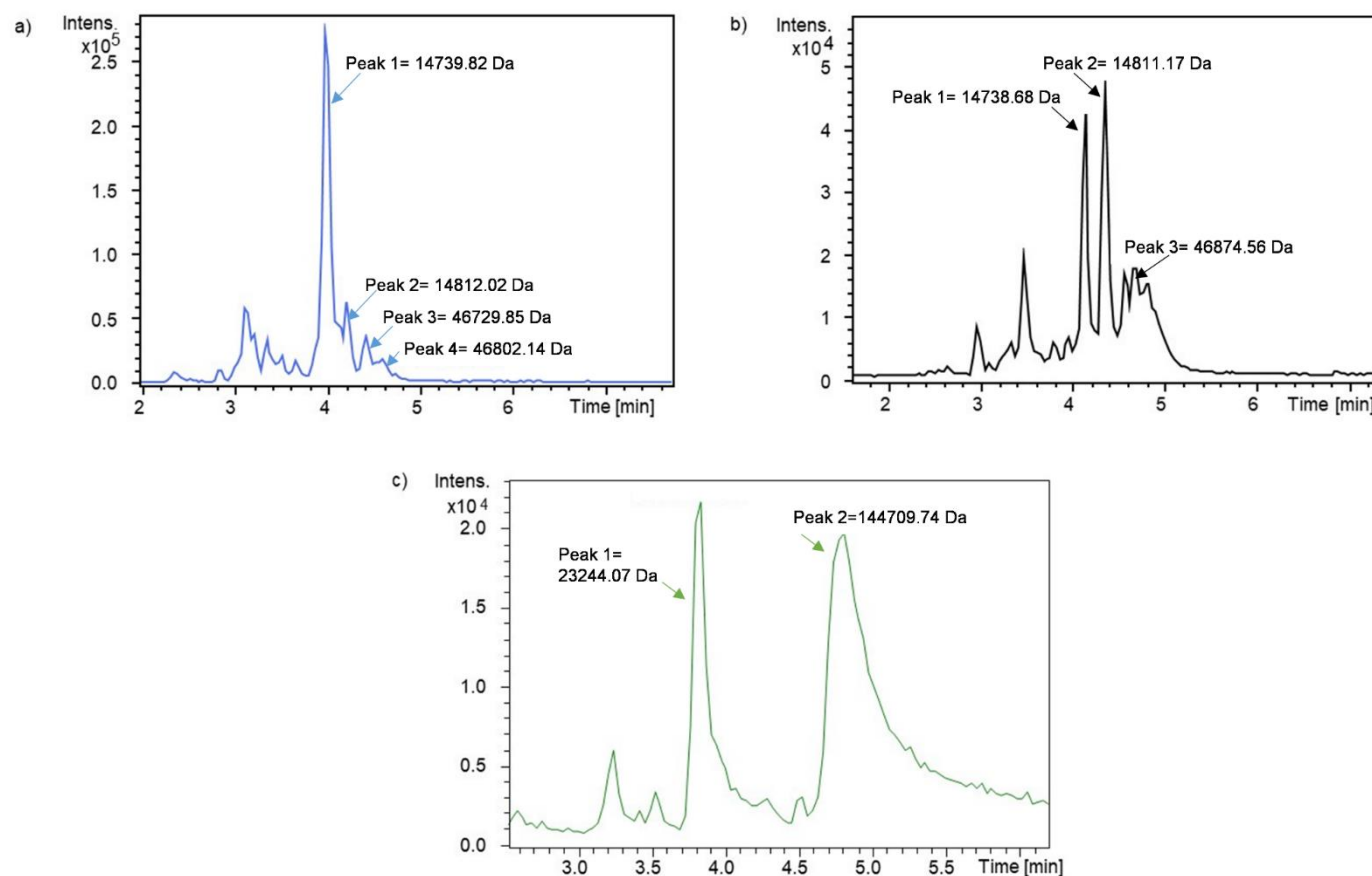

Figure S3: Chromatograms of RPLC-MS analysis for intact DEPC labeled long-term stored SILuMAb a) S<sub>2</sub>yr sample with overhead annotation of the peak number and the mass (Da) detected at that specific RT. No monomeric peak is detected. b) S<sub>1</sub>yr sample with overhead annotation of the peak number and the mass (Da) detected at that specific RT. Monomer mass is not detected. c) S<sub>0</sub>yr sample with 2 peaks, and respective overhead annotations of the masses under these peaks. The second peak denotes the mass of deglycosylated and DEPC labeled monomer

Table S1: Logarithmised (log 2) intensity values for the sample set of heat stressed fresh SILuMAB (SH) and non-heat stressed SILuMAB (SO). NaN denotes missing value. The positions common with the heat stressed one-year stored SILuMAB vs non –heat stressed one year stored SILuMAB experiment (supporting table 3) are highlighted in bold & italics.

| Log <sub>2</sub><br>intensity<br>SH_1 | Log <sub>2</sub><br>intensity<br>SH_2 | Log <sub>2</sub><br>intensity<br>SH_3 | Log <sub>2</sub><br>intensity<br>SH_4 | Log <sub>2</sub><br>intensity<br>SO_1 | Log <sub>2</sub><br>intensity<br>SO_2 | Log <sub>2</sub><br>intensity<br>SO_3 | Log <sub>2</sub><br>intensity<br>SO_4 | Mod.<br>Names                 | Mod<br>. AAs    | AA<br>positi<br>on | Protei<br>n chain                  |
|---------------------------------------|---------------------------------------|---------------------------------------|---------------------------------------|---------------------------------------|---------------------------------------|---------------------------------------|---------------------------------------|-------------------------------|-----------------|--------------------|------------------------------------|
| 19.95                                 | NaN                                   | 20.68                                 | 21.07                                 | 21.21                                 | 21.22                                 | 22.28                                 | 21.55                                 | DEPC/72.0<br>2                | H               | 208                | SILu<br>MAB-<br>HC                 |
| NaN                                   | 21.39                                 | 21.15                                 | NaN                                   | 21.00                                 | NaN                                   | 19.89                                 | NaN                                   | DEPC/72.0<br>2                | H               | 272                | SILu<br>MAB-<br>HC                 |
| <i>NaN</i>                            | <b><i>20.55</i></b>                   | <b><i>22.07</i></b>                   | <b><i>20.44</i></b>                   | <b><i>20.69</i></b>                   | <b><i>19.16</i></b>                   | <i>NaN</i>                            | <i>NaN</i>                            | <b><i>DEPC/72.0<br/>2</i></b> | <b><i>H</i></b> | <b><i>289</i></b>  | <b><i>SILu<br/>MAB-<br/>HC</i></b> |
| 19.64                                 | 22.28                                 | 22.44                                 | 22.66                                 | 21.74                                 | 19.97                                 | NaN                                   | NaN                                   | DEPC/72.0<br>2                | H               | 314                | SILu<br>MAB-<br>HC                 |
| <b><i>21.98</i></b>                   | <b><i>22.90</i></b>                   | <b><i>23.23</i></b>                   | <b><i>23.13</i></b>                   | <b><i>22.52</i></b>                   | <b><i>20.40</i></b>                   | <b><i>21.79</i></b>                   | <i>NaN</i>                            | <b><i>DEPC/72.0<br/>2</i></b> | <b><i>K</i></b> | <b><i>43</i></b>   | <b><i>SILu<br/>MAB-<br/>HC</i></b> |
| <b><i>21.07</i></b>                   | <b><i>22.37</i></b>                   | <b><i>21.89</i></b>                   | <b><i>21.80</i></b>                   | <b><i>21.61</i></b>                   | <b><i>20.97</i></b>                   | <b><i>20.82</i></b>                   | <i>NaN</i>                            | <b><i>DEPC/72.0<br/>2</i></b> | <b><i>K</i></b> | <b><i>44</i></b>   | <b><i>SILu<br/>MAB-<br/>LC</i></b> |
| <b><i>19.37</i></b>                   | <b><i>20.89</i></b>                   | <b><i>20.13</i></b>                   | <b><i>18.66</i></b>                   | <b><i>19.15</i></b>                   | <b><i>18.83</i></b>                   | <i>NaN</i>                            | <i>NaN</i>                            | <b><i>DEPC/72.0<br/>2</i></b> | <b><i>K</i></b> | <b><i>47</i></b>   | <b><i>SILu<br/>MAB-<br/>LC</i></b> |
| <b><i>22.43</i></b>                   | <b><i>23.25</i></b>                   | <b><i>23.02</i></b>                   | <b><i>22.90</i></b>                   | <b><i>23.53</i></b>                   | <b><i>22.70</i></b>                   | <b><i>22.92</i></b>                   | <b><i>22.80</i></b>                   | <b><i>DEPC/72.0<br/>2</i></b> | <b><i>K</i></b> | <b><i>50</i></b>   | <b><i>SILu<br/>MAB-<br/>HC</i></b> |
| <b><i>22.12</i></b>                   | <b><i>22.00</i></b>                   | <b><i>21.85</i></b>                   | <b><i>22.47</i></b>                   | <b><i>22.02</i></b>                   | <b><i>22.10</i></b>                   | <b><i>21.01</i></b>                   | <b><i>21.00</i></b>                   | <b><i>DEPC/72.0<br/>2</i></b> | <b><i>K</i></b> | <b><i>55</i></b>   | <b><i>SILu<br/>MAB-<br/>LC</i></b> |

|              |              |              |              |              |              |              |              |                        |          |            |                             |
|--------------|--------------|--------------|--------------|--------------|--------------|--------------|--------------|------------------------|----------|------------|-----------------------------|
| <b>22.68</b> | <b>22.91</b> | <b>23.19</b> | <b>NaN</b>   | <b>23.72</b> | <b>23.75</b> | <b>22.95</b> | <b>22.97</b> | <b>DEPC/72.0<br/>2</b> | <b>K</b> | <b>64</b>  | <b>SILu<br/>MAb-<br/>HC</b> |
| <b>19.97</b> | <b>23.59</b> | <b>21.58</b> | <b>21.47</b> | <b>21.79</b> | <b>20.29</b> | <b>20.73</b> | <b>19.82</b> | <b>DEPC/72.0<br/>2</b> | <b>K</b> | <b>75</b>  | <b>SILu<br/>MAb-<br/>HC</b> |
| <b>20.70</b> | <b>21.55</b> | <b>20.70</b> | <b>21.02</b> | <b>21.22</b> | <b>19.97</b> | <b>20.69</b> | <b>NaN</b>   | <b>DEPC/72.0<br/>2</b> | <b>K</b> | <b>116</b> | <b>SILu<br/>MAb-<br/>LC</b> |
| 19.91        | 21.97        | NaN          | NaN          | 21.00        | NaN          | 19.84        | NaN          | DEPC/72.0<br>2         | K        | 135        | SILu<br>MAb-<br>LC          |
| <b>20.65</b> | <b>20.82</b> | <b>21.53</b> | <b>20.33</b> | <b>22.37</b> | <b>21.87</b> | <b>21.20</b> | <b>21.00</b> | <b>DEPC/72.0<br/>2</b> | <b>K</b> | <b>162</b> | <b>SILu<br/>MAb-<br/>LC</b> |
| 19.27        | 19.82        | 21.08        | 21.10        | 20.69        | 20.92        | 19.88        | 18.92        | DEPC/72.0<br>2         | K        | 172        | SILu<br>MAb-<br>LC          |
| <b>20.62</b> | <b>21.52</b> | <b>21.83</b> | <b>21.29</b> | <b>21.11</b> | <b>NaN</b>   | <b>20.67</b> | <b>NaN</b>   | <b>DEPC/72.0<br/>2</b> | <b>K</b> | <b>177</b> | <b>SILu<br/>MAb-<br/>LC</b> |
| <b>21.87</b> | <b>22.39</b> | <b>22.02</b> | <b>22.08</b> | <b>22.32</b> | <b>22.14</b> | <b>22.60</b> | <b>20.68</b> | <b>DEPC/72.0<br/>2</b> | <b>K</b> | <b>192</b> | <b>SILu<br/>MAb-<br/>LC</b> |
| 19.19        | NaN          | 21.04        | 20.25        | 21.80        | 20.48        | 21.31        | NaN          | DEPC/72.0<br>2         | K        | 209        | SILu<br>MAb-<br>HC          |
| NaN          | 22.16        | 22.50        | NaN          | 23.04        | 19.39        | NaN          | 18.45        | DEPC/72.0<br>2         | K        | 226        | SILu<br>MAb-<br>HC          |
| <b>NaN</b>   | <b>20.32</b> | <b>20.81</b> | <b>21.09</b> | <b>21.34</b> | <b>NaN</b>   | <b>19.63</b> | <b>NaN</b>   | <b>DEPC/72.0<br/>2</b> | <b>K</b> | <b>252</b> | <b>SILu<br/>MAb-<br/>HC</b> |

|              |              |              |              |              |              |              |              |                        |          |            |                             |
|--------------|--------------|--------------|--------------|--------------|--------------|--------------|--------------|------------------------|----------|------------|-----------------------------|
| <b>22.23</b> | <b>22.84</b> | <b>22.32</b> | <b>20.86</b> | <b>22.19</b> | <b>20.61</b> | <b>22.40</b> | <b>19.13</b> | <b>DEPC/72.0<br/>2</b> | <b>K</b> | <b>278</b> | <b>SILu<br/>MAb-<br/>HC</b> |
| <b>19.14</b> | <b>20.83</b> | <b>19.68</b> | <b>18.95</b> | <b>20.91</b> | <b>20.54</b> | <b>19.73</b> | <b>19.08</b> | <b>DEPC/72.0<br/>2</b> | <b>K</b> | <b>292</b> | <b>SILu<br/>MAb-<br/>HC</b> |
| <b>21.84</b> | <b>22.30</b> | <b>22.38</b> | <b>22.72</b> | <b>22.34</b> | <b>21.57</b> | <b>21.71</b> | <b>21.20</b> | <b>DEPC/72.0<br/>2</b> | <b>K</b> | <b>321</b> | <b>SILu<br/>MAb-<br/>HC</b> |
| <b>21.92</b> | <b>22.68</b> | <b>22.01</b> | <b>22.30</b> | <b>23.28</b> | <b>21.47</b> | <b>22.28</b> | <b>NaN</b>   | <b>DEPC/72.0<br/>2</b> | <b>K</b> | <b>324</b> | <b>SILu<br/>MAb-<br/>HC</b> |
| NaN          | 20.03        | 20.80        | NaN          | 21.99        | 21.86        | 21.47        | NaN          | DEPC/72.0<br>2         | K        | 326        | SILu<br>MAb-<br>HC          |
| <b>22.17</b> | <b>23.01</b> | <b>22.32</b> | <b>NaN</b>   | <b>22.45</b> | <b>22.41</b> | <b>22.32</b> | <b>21.41</b> | <b>DEPC/72.0<br/>2</b> | <b>K</b> | <b>330</b> | <b>SILu<br/>MAb-<br/>HC</b> |
| <b>23.62</b> | <b>23.95</b> | <b>23.35</b> | <b>22.96</b> | <b>23.07</b> | <b>20.65</b> | <b>23.17</b> | <b>NaN</b>   | <b>DEPC/72.0<br/>2</b> | <b>K</b> | <b>338</b> | <b>SILu<br/>MAb-<br/>HC</b> |
| 20.04        | 20.60        | 20.70        | NaN          | 18.74        | 19.80        | NaN          | 18.81        | DEPC/72.0<br>2         | K        | 342        | SILu<br>MAb-<br>HC          |
| 21.14        | 21.90        | 22.12        | NaN          | 22.72        | 22.66        | NaN          | 21.55        | DEPC/72.0<br>2         | K        | 418        | SILu<br>MAb-<br>HC          |
| 20.10        | NaN          | 21.82        | NaN          | 21.17        | 24.25        | NaN          | NaN          | DEPC/72.0<br>2         | S        | 62         | SILu<br>MAb-<br>HC          |
| <b>21.21</b> | <b>22.22</b> | <b>21.08</b> | <b>21.61</b> | <b>21.89</b> | <b>NaN</b>   | <b>21.47</b> | <b>NaN</b>   | <b>DEPC/72.0<br/>2</b> | <b>S</b> | <b>135</b> | <b>SILu<br/>MAb-<br/>HC</b> |

|              |              |              |              |              |              |              |              |                        |          |            |                             |
|--------------|--------------|--------------|--------------|--------------|--------------|--------------|--------------|------------------------|----------|------------|-----------------------------|
| <b>21.21</b> | <b>22.22</b> | <b>21.93</b> | <b>21.61</b> | <b>21.89</b> | <b>20.80</b> | <b>21.47</b> | <b>19.30</b> | <b>DEPC/72.0<br/>2</b> | <b>S</b> | <b>136</b> | <b>SILu<br/>MAb-<br/>HC</b> |
| 18.62        | 19.28        | 18.71        | NaN          | 19.16        | NaN          | 19.38        | 19.22        | DEPC/72.0<br>2         | S        | 159        | SILu<br>MAb-<br>LC          |
| NaN          | 20.75        | 22.05        | 21.19        | 22.73        | NaN          | 20.62        | NaN          | DEPC/72.0<br>2         | S        | 171        | SILu<br>MAb-<br>LC          |
| NaN          | 22.65        | 21.25        | NaN          | 22.63        | 20.76        | 20.86        | NaN          | DEPC/72.0<br>2         | S        | 188        | SILu<br>MAb-<br>HC          |
| NaN          | 21.05        | 19.64        | NaN          | 19.84        | 19.50        | NaN          | 20.12        | DEPC/72.0<br>2         | S        | 198        | SILu<br>MAb-<br>LC          |
| <b>19.26</b> | <b>20.04</b> | <b>19.88</b> | <b>NaN</b>   | <b>19.81</b> | <b>19.62</b> | <b>18.95</b> | <b>18.56</b> | <b>DEPC/72.0<br/>2</b> | <b>S</b> | <b>258</b> | <b>SILu<br/>MAb-<br/>HC</b> |
| NaN          | 23.18        | 20.80        | NaN          | 21.82        | NaN          | 22.18        | NaN          | DEPC/72.0<br>2         | T        | 191        | SILu<br>MAb-<br>HC          |
| 20.59        | 21.97        | 21.87        | 20.81        | 19.33        | NaN          | 18.88        | NaN          | DEPC/72.0<br>2         | Y        | 32         | SILu<br>MAb-<br>HC          |
| <b>NaN</b>   | <b>NaN</b>   | <b>22.96</b> | <b>22.82</b> | <b>22.31</b> | <b>21.70</b> | <b>NaN</b>   | <b>NaN</b>   | <b>DEPC/72.0<br/>2</b> | <b>Y</b> | <b>32</b>  | <b>SILu<br/>MAb-<br/>LC</b> |
| <b>21.27</b> | <b>20.91</b> | <b>21.25</b> | <b>21.65</b> | <b>21.17</b> | <b>21.44</b> | <b>21.01</b> | <b>21.02</b> | <b>DEPC/72.0<br/>2</b> | <b>Y</b> | <b>51</b>  | <b>SILu<br/>MAb-<br/>LC</b> |
| NaN          | NaN          | 19.86        | 19.15        | NaN          | 18.93        | 20.56        | NaN          | DEPC/72.0<br>2         | Y        | 183        | SILu<br>MAb-<br>LC          |

|              |              |              |              |              |              |              |              |                               |          |            |                             |
|--------------|--------------|--------------|--------------|--------------|--------------|--------------|--------------|-------------------------------|----------|------------|-----------------------------|
| <b>20.83</b> | <b>21.66</b> | <b>21.60</b> | <b>21.55</b> | <b>21.46</b> | <b>20.97</b> | <b>20.94</b> | <b>19.69</b> | <b>DEPC/72.0<br/>2</b>        | <b>Y</b> | <b>282</b> | <b>SILu<br/>MAb-<br/>HC</b> |
| <b>20.79</b> | <b>23.38</b> | <b>23.06</b> | <b>22.88</b> | <b>23.08</b> | <b>21.37</b> | <b>22.36</b> | <b>NaN</b>   | <b>DEPC/72.0<br/>2</b>        | <b>Y</b> | <b>323</b> | <b>SILu<br/>MAb-<br/>HC</b> |
| NaN          | 19.47        | 20.66        | 20.50        | 21.08        | NaN          | 18.92        | 21.24        | DEPC/72.0<br>2;DEPC/72.<br>02 | K,S      | 43,49      | SILu<br>MAb-<br>HC          |
| 20.13        | 21.60        | 21.88        | 22.28        | 22.43        | 20.12        | 21.00        | NaN          | DEPC/72.0<br>2;DEPC/72.<br>02 | K,S      | 50,62      | SILu<br>MAb-<br>HC          |
| NaN          | NaN          | 19.70        | 20.06        | 20.88        | 19.90        | NaN          | NaN          | DEPC/72.0<br>2;DEPC/72.<br>02 | S,K      | 49,64      | SILu<br>MAb-<br>HC          |



Table S2: Logarithmised (log 2) intensity values for the sample set of heat stressed one year stored SILuMAb (LS\_H) and non –heat stressed one year stored SILuMAb (LS\_O). NaN denotes missing value. The positions common with the heat stressed fresh SILuMAb vs non –heat stressed fresh SILuMAb experiment (supporting table 2) are highlighted in bold & italics.

| Log <sub>2</sub><br>inten<br>sity<br>LS_<br>H_1 | Log <sub>2</sub><br>inten<br>sity<br>LS_<br>H_2 | Log <sub>2</sub><br>inten<br>sity<br>LS_<br>H_3 | Log <sub>2</sub><br>inten<br>sity<br>LS_<br>H_4 | Log <sub>2</sub><br>inten<br>sity<br>LS_<br>H_5 | Log <sub>2</sub><br>inten<br>sity<br>LS_<br>H_6 | Log <sub>2</sub><br>inte<br>nsit<br>y<br>LS_<br>O_1 | Log <sub>2</sub><br>inte<br>nsit<br>y<br>LS_<br>O_2 | Log <sub>2</sub><br>inte<br>nsit<br>y<br>LS_<br>O_3 | Log <sub>2</sub><br>inte<br>nsit<br>y<br>LS_<br>O_4 | Log <sub>2</sub><br>inten<br>sity<br>LS_<br>O_5 | Log <sub>2</sub><br>intens<br>ity<br>LS_O<br>_6 | Mod. Names        | Mod<br>.<br>AAs | AA<br>posit<br>ion | Protein chain          |
|-------------------------------------------------|-------------------------------------------------|-------------------------------------------------|-------------------------------------------------|-------------------------------------------------|-------------------------------------------------|-----------------------------------------------------|-----------------------------------------------------|-----------------------------------------------------|-----------------------------------------------------|-------------------------------------------------|-------------------------------------------------|-------------------|-----------------|--------------------|------------------------|
| 23.0<br>2                                       | 24.3<br>9                                       | 24.0<br>7                                       | 22.6<br>3                                       | 24.8<br>4                                       | 23.3<br>5                                       | 23.<br>77                                           | 23.<br>77                                           | 23.<br>81                                           | 23.<br>79                                           | 23.5<br>2                                       | 23.51                                           | DEPC/72.02        | H               | 35                 | SILuMAb-<br>HC         |
| <b>22.3<br/>3</b>                               | <b>22.4<br/>0</b>                               | <b>22.1<br/>0</b>                               | <b>21.9<br/>8</b>                               | <b>22.7<br/>6</b>                               | <b>22.7<br/>8</b>                               | <b>22.<br/>68</b>                                   | <b>22.<br/>69</b>                                   | <b>22.<br/>93</b>                                   | <b>22.<br/>94</b>                                   | <b>22.6<br/>6</b>                               | <b>22.63</b>                                    | <b>DEPC/72.02</b> | <b>H</b>        | <b>272</b>         | <b>SILuMAb-<br/>HC</b> |
| <b>21.3<br/>4</b>                               | <b>21.9<br/>5</b>                               | <b>21.0<br/>8</b>                               | <b>21.5<br/>2</b>                               | <b>23.0<br/>0</b>                               | <b>23.0<br/>2</b>                               | <b>22.<br/>80</b>                                   | <b>22.<br/>79</b>                                   | <b>23.<br/>15</b>                                   | <b>23.<br/>15</b>                                   | <b>22.9<br/>9</b>                               | <b>23.48</b>                                    | <b>DEPC/72.02</b> | <b>H</b>        | <b>289</b>         | <b>SILuMAb-<br/>HC</b> |
| <b>22.9<br/>6</b>                               | <b>22.9<br/>5</b>                               | <b>22.7<br/>9</b>                               | <b>22.7<br/>2</b>                               | <b>23.0<br/>9</b>                               | <b>23.3<br/>6</b>                               | <b>23.<br/>54</b>                                   | <b>23.<br/>52</b>                                   | <b>23.<br/>60</b>                                   | <b>23.<br/>54</b>                                   | <b>23.3<br/>5</b>                               | <b>23.70</b>                                    | <b>DEPC/72.02</b> | <b>H</b>        | <b>314</b>         | <b>SILuMAb-<br/>HC</b> |
| 22.5<br>9                                       | 22.2<br>3                                       | 22.8<br>4                                       | 20.8<br>8                                       | 22.9<br>0                                       | 23.1<br>5                                       | 23.<br>94                                           | 23.<br>48                                           | 24.<br>23                                           | 23.<br>86                                           | 24.3<br>0                                       | 23.35                                           | DEPC/72.02        | H               | 433                | SILuMAb-<br>HC         |
| 22.6<br>5                                       | 22.6<br>5                                       | NaN                                             | NaN                                             | 21.1<br>0                                       | NaN                                             | 22.<br>69                                           | 23.<br>25                                           | 23.<br>56                                           | 23.<br>13                                           | 24.2<br>8                                       | 22.69                                           | DEPC/72.02        | H               | 437                | SILuMAb-<br>HC         |
| 22.4<br>3                                       | NaN                                             | NaN                                             | 22.3<br>4                                       | 24.0<br>4                                       | 21.6<br>0                                       | NaN                                                 | 21.<br>73                                           | 21.<br>91                                           | 23.<br>19                                           | NaN                                             | 23.95                                           | DEPC/72.02        | H               | 439                | SILuMAb-<br>HC         |
| <b>23.2<br/>4</b>                               | <b>23.2<br/>8</b>                               | <b>23.3<br/>1</b>                               | <b>23.3<br/>4</b>                               | <b>23.8<br/>0</b>                               | <b>23.7<br/>5</b>                               | <b>20.<br/>55</b>                                   | <b>20.<br/>49</b>                                   | <b>20.<br/>84</b>                                   | <b>20.<br/>84</b>                                   | <b>20.6<br/>5</b>                               | <b>20.68</b>                                    | <b>DEPC/72.02</b> | <b>K</b>        | <b>43</b>          | <b>SILuMAb-<br/>HC</b> |
| <b>22.8<br/>5</b>                               | <b>22.8<br/>7</b>                               | <b>22.7<br/>5</b>                               | <b>22.7<br/>2</b>                               | <b>23.1<br/>7</b>                               | <b>23.1<br/>4</b>                               | <b>23.<br/>34</b>                                   | <b>23.<br/>32</b>                                   | <b>23.<br/>56</b>                                   | <b>23.<br/>58</b>                                   | <b>23.8<br/>0</b>                               | <b>23.41</b>                                    | <b>DEPC/72.02</b> | <b>K</b>        | <b>50</b>          | <b>SILuMAb-<br/>HC</b> |
| <b>24.9<br/>5</b>                               | <b>24.9<br/>4</b>                               | <b>24.9<br/>6</b>                               | <b>24.9<br/>6</b>                               | <b>25.3<br/>7</b>                               | <b>25.3<br/>4</b>                               | <b>25.<br/>21</b>                                   | <b>25.<br/>21</b>                                   | <b>25.<br/>41</b>                                   | <b>25.<br/>40</b>                                   | <b>26.3<br/>8</b>                               | <b>26.36</b>                                    | <b>DEPC/72.02</b> | <b>K</b>        | <b>64</b>          | <b>SILuMAb-<br/>HC</b> |
| <b>24.9<br/>4</b>                               | <b>24.9<br/>3</b>                               | <b>24.7<br/>1</b>                               | <b>24.7<br/>0</b>                               | <b>25.2<br/>1</b>                               | <b>25.1<br/>9</b>                               | <b>24.<br/>98</b>                                   | <b>24.<br/>97</b>                                   | <b>25.<br/>14</b>                                   | <b>25.<br/>13</b>                                   | <b>24.9<br/>8</b>                               | <b>24.98</b>                                    | <b>DEPC/72.02</b> | <b>K</b>        | <b>75</b>          | <b>SILuMAb-<br/>HC</b> |

|           |           |           |           |           |           |           |           |           |           |           |       |            |   |     |                |
|-----------|-----------|-----------|-----------|-----------|-----------|-----------|-----------|-----------|-----------|-----------|-------|------------|---|-----|----------------|
| 21.8<br>3 | 21.8<br>3 | 22.0<br>2 | 21.9<br>6 | 22.5<br>6 | 22.2<br>2 | 22.<br>96 | 22.<br>98 | 22.<br>68 | 22.<br>63 | 22.4<br>8 | 22.45 | DEPC/72.02 | K | 125 | SILuMAb-<br>HC |
| 25.0<br>6 | 25.0<br>5 | 25.0<br>6 | 24.5<br>3 | 25.3<br>9 | 25.1<br>3 | 25.<br>16 | 25.<br>17 | 25.<br>07 | 25.<br>46 | 24.4<br>4 | 25.38 | DEPC/72.02 | K | 137 | SILuMAb-<br>HC |
| 20.6<br>8 | 20.3<br>2 | 20.9<br>0 | 20.5<br>9 | 21.0<br>5 | 21.0<br>0 | 21.<br>65 | 21.<br>10 | 21.<br>51 | 21.<br>37 | 21.3<br>9 | 21.39 | DEPC/72.02 | K | 250 | SILuMAb-<br>HC |
| 21.4<br>3 | 20.9<br>7 | 20.4<br>7 | 21.0<br>5 | 22.1<br>5 | 21.7<br>7 | 22.<br>05 | 22.<br>04 | 22.<br>11 | 22.<br>10 | 22.1<br>7 | 22.15 | DEPC/72.02 | K | 252 | SILuMAb-<br>HC |
| 21.1<br>0 | 20.9<br>2 | 20.6<br>9 | 20.8<br>3 | 21.0<br>2 | 21.0<br>2 | 21.<br>58 | 21.<br>52 | 21.<br>40 | 21.<br>49 | 21.3<br>1 | 21.44 | DEPC/72.02 | K | 278 | SILuMAb-<br>HC |
| 20.3<br>4 | 20.2<br>7 | 20.7<br>2 | 20.2<br>5 | 21.1<br>5 | 21.4<br>4 | 21.<br>70 | 21.<br>27 | 21.<br>58 | 22.<br>04 | 21.5<br>8 | 21.88 | DEPC/72.02 | K | 292 | SILuMAb-<br>HC |
| 23.1<br>0 | 23.1<br>1 | 23.4<br>4 | 23.3<br>0 | 23.6<br>4 | 23.4<br>0 | 23.<br>35 | 23.<br>85 | 23.<br>21 | 23.<br>21 | 22.9<br>6 | 22.95 | DEPC/72.02 | K | 321 | SILuMAb-<br>HC |
| 22.1<br>6 | 22.2<br>2 | 22.1<br>2 | 22.1<br>6 | 22.8<br>2 | 22.8<br>5 | 23.<br>06 | 23.<br>07 | 22.<br>99 | 22.<br>99 | 22.8<br>6 | 22.86 | DEPC/72.02 | K | 324 | SILuMAb-<br>HC |
| 22.1<br>8 | 20.9<br>0 | NaN       | NaN       | 22.5<br>6 | 22.3<br>8 | Na<br>N   | Na<br>N   | 23.<br>39 | 22.<br>77 | NaN       | 22.70 | DEPC/72.02 | K | 326 | SILuMAb-<br>HC |
| 23.3<br>5 | 24.2<br>8 | 23.5<br>6 | 23.5<br>5 | 23.4<br>6 | 23.4<br>3 | 24.<br>35 | 23.<br>88 | 24.<br>52 | 24.<br>02 | 24.1<br>2 | 24.13 | DEPC/72.02 | K | 330 | SILuMAb-<br>HC |
| 24.6<br>5 | 24.6<br>6 | 24.9<br>7 | 24.9<br>8 | 25.2<br>6 | 25.2<br>4 | 25.<br>67 | 25.<br>67 | 25.<br>82 | 25.<br>82 | 25.8<br>1 | 25.81 | DEPC/72.02 | K | 338 | SILuMAb-<br>HC |
| NaN       | 19.9<br>5 | 20.6<br>4 | 20.4<br>4 | 21.3<br>1 | 21.2<br>1 | 21.<br>59 | 21.<br>72 | 21.<br>96 | 22.<br>36 | 22.6<br>3 | 22.60 | DEPC/72.02 | K | 342 | SILuMAb-<br>HC |
| 24.7<br>1 | 24.4<br>2 | 24.8<br>0 | 24.4<br>0 | 24.9<br>1 | 24.8<br>9 | 24.<br>56 | 24.<br>47 | 24.<br>19 | 24.<br>68 | 24.6<br>5 | 24.38 | DEPC/72.02 | K | 364 | SILuMAb-<br>HC |
| 22.5<br>6 | 22.5<br>5 | 22.7<br>5 | 22.6<br>3 | 23.3<br>9 | 23.2<br>7 | 24.<br>42 | 23.<br>68 | 23.<br>43 | 23.<br>34 | 23.1<br>6 | 23.10 | DEPC/72.02 | K | 396 | SILuMAb-<br>HC |
| 28.2<br>4 | 28.2<br>4 | 28.3<br>0 | 28.3<br>0 | 28.6<br>3 | 28.6<br>1 | 28.<br>41 | 28.<br>41 | 28.<br>55 | 28.<br>55 | 28.5<br>7 | 28.56 | DEPC/72.02 | K | 418 | SILuMAb-<br>HC |
| 21.7<br>3 | NaN       | 23.1<br>7 | 23.1<br>6 | NaN       | 23.1<br>6 | Na<br>N   | 23.<br>04 | 23.<br>94 | Na<br>N   | 23.3<br>1 | 23.18 | DEPC/72.02 | K | 443 | SILuMAb-<br>HC |

|                   |                   |                   |                   |                   |                   |                   |                   |                   |                   |                   |              |                   |          |            |                        |
|-------------------|-------------------|-------------------|-------------------|-------------------|-------------------|-------------------|-------------------|-------------------|-------------------|-------------------|--------------|-------------------|----------|------------|------------------------|
| 21.0<br>2         | 20.9<br>6         | 21.1<br>0         | 21.0<br>1         | 21.4<br>1         | 21.1<br>8         | 21.<br>59         | 21.<br>63         | Na<br>N           | 21.<br>72         | NaN               | 21.79        | DEPC/72.02        | S        | 128        | SILuMAb-<br>HC         |
| <i>NaN</i>        | <b>20.9<br/>6</b> | <i>NaN</i>        | <b>25.7<br/>6</b> | <i>NaN</i>        | <b>21.1<br/>8</b> | <i>Na<br/>N</i>   | <b>25.<br/>78</b> | <i>Na<br/>N</i>   | <i>Na<br/>N</i>   | <b>21.7<br/>9</b> | <b>21.79</b> | <b>DEPC/72.02</b> | <i>S</i> | <b>135</b> | <b>SILuMAb-<br/>HC</b> |
| 21.0<br>2         | NaN               | 21.1<br>0         | NaN               | 23.3<br>1         | NaN               | 21.<br>59         | Na<br>N           | Na<br>N           | Na<br>N           | 22.4<br>6         | 23.63        | DEPC/72.02        | S        | 136        | SILuMAb-<br>HC         |
| <i>NaN</i>        | <b>20.9<br/>7</b> | <i>NaN</i>        | <b>21.0<br/>5</b> | <b>21.7<br/>9</b> | <i>NaN</i>        | <b>21.<br/>64</b> | <b>21.<br/>61</b> | <b>20.<br/>00</b> | <b>19.<br/>97</b> | <b>22.4<br/>4</b> | <b>21.67</b> | <b>DEPC/72.02</b> | <i>S</i> | <b>258</b> | <b>SILuMAb-<br/>HC</b> |
| 22.3<br>3         | NaN               | 21.7<br>6         | NaN               | NaN               | 22.7<br>8         | Na<br>N           | Na<br>N           | 22.<br>93         | 22.<br>94         | 22.6<br>6         | 22.63        | DEPC/72.02        | S        | 271        | SILuMAb-<br>HC         |
| 22.3<br>5         | 20.3<br>3         | 23.3<br>9         | NaN               | 21.1<br>4         | 20.8<br>7         | 21.<br>30         | 21.<br>32         | 23.<br>02         | Na<br>N           | 22.2<br>6         | 21.95        | DEPC/72.02        | T        | 441        | SILuMAb-<br>HC         |
| 23.4<br>6         | 22.7<br>9         | 23.3<br>9         | 22.5<br>4         | 23.7<br>7         | 23.2<br>4         | 22.<br>89         | 22.<br>40         | 22.<br>44         | 22.<br>91         | 23.5<br>2         | 23.51        | DEPC/72.02        | Y        | 32         | SILuMAb-<br>HC         |
| NaN               | 20.3<br>2         | 19.9<br>6         | NaN               | 20.4<br>9         | 20.4<br>9         | Na<br>N           | 20.<br>02         | 20.<br>16         | 20.<br>31         | 19.9<br>7         | NaN          | DEPC/72.02        | Y        | 79         | SILuMAb-<br>HC         |
| 22.6<br>1         | 22.6<br>4         | 22.6<br>3         | 22.6<br>7         | 23.2<br>0         | 23.1<br>8         | 21.<br>80         | 21.<br>79         | 21.<br>98         | 21.<br>97         | 21.9<br>2         | 21.95        | DEPC/72.02        | Y        | 93         | SILuMAb-<br>HC         |
| <b>21.1<br/>8</b> | <b>21.2<br/>9</b> | <b>21.2<br/>5</b> | <b>21.2<br/>1</b> | <b>21.7<br/>5</b> | <b>21.8<br/>1</b> | <b>21.<br/>74</b> | <b>22.<br/>16</b> | <b>22.<br/>52</b> | <b>22.<br/>53</b> | <b>22.4<br/>0</b> | <b>22.39</b> | <b>DEPC/72.02</b> | <i>Y</i> | <b>282</b> | <b>SILuMAb-<br/>HC</b> |
| <b>21.6<br/>3</b> | <b>21.6<br/>5</b> | <b>21.8<br/>6</b> | <b>21.5<br/>7</b> | <b>22.1<br/>4</b> | <b>22.1<br/>8</b> | <b>22.<br/>56</b> | <b>22.<br/>63</b> | <b>24.<br/>22</b> | <b>24.<br/>21</b> | <b>23.9<br/>8</b> | <b>23.09</b> | <b>DEPC/72.02</b> | <i>Y</i> | <b>323</b> | <b>SILuMAb-<br/>HC</b> |
| 22.0<br>8         | NaN               | 21.7<br>6         | NaN               | NaN               | 21.6<br>8         | 22.<br>24         | 22.<br>24         | Na<br>N           | 22.<br>26         | 22.2<br>0         | 22.23        | DEPC/72.02        | Y        | 377        | SILuMAb-<br>HC         |
| 22.0<br>5         | NaN               | 22.6<br>2         | 23.3<br>9         | 24.3<br>4         | 23.7<br>3         | 23.<br>44         | 23.<br>30         | 22.<br>90         | 22.<br>63         | 22.7<br>7         | 23.45        | DEPC/72.02        | Y        | 440        | SILuMAb-<br>HC         |
| 24.0<br>3         | 21.7<br>0         | 23.7<br>0         | 20.8<br>9         | 24.0<br>7         | 24.1<br>9         | 24.<br>53         | 20.<br>61         | 24.<br>48         | 24.<br>48         | 20.4<br>1         | 24.43        | DEPC/72.02        | H        | 41         | SILuMAb-<br>LC         |
| NaN               | 23.7<br>1         | 23.4<br>6         | 23.4<br>6         | 23.8<br>0         | 23.8<br>5         | 23.<br>78         | 23.<br>76         | Na<br>N           | 24.<br>43         | NaN               | 24.68        | DEPC/72.02        | H        | 203        | SILuMAb-<br>LC         |
| 23.6<br>6         | 23.6<br>6         | 23.4<br>3         | 23.4<br>2         | 24.4<br>5         | 23.9<br>2         | 24.<br>19         | 24.<br>20         | 24.<br>22         | 24.<br>20         | 24.1<br>5         | 24.15        | DEPC/72.02        | K        | 44         | SILuMAb-<br>LC         |

|           |           |           |           |           |           |           |           |           |           |           |       |                           |     |             |                |
|-----------|-----------|-----------|-----------|-----------|-----------|-----------|-----------|-----------|-----------|-----------|-------|---------------------------|-----|-------------|----------------|
| 22.6<br>9 | 22.7<br>1 | 22.7<br>8 | 22.7<br>6 | 23.1<br>8 | 22.8<br>5 | 22.<br>53 | 22.<br>47 | 22.<br>69 | 22.<br>64 | 23.0<br>7 | 23.06 | DEPC/72.02                | K   | 47          | SILuMAb-<br>LC |
| 23.2<br>0 | 23.2<br>1 | 23.7<br>3 | 23.0<br>2 | 23.2<br>7 | 23.2<br>7 | 22.<br>22 | 23.<br>80 | 22.<br>81 | 23.<br>89 | 23.8<br>4 | 24.03 | DEPC/72.02                | K   | 55          | SILuMAb-<br>LC |
| 21.3<br>8 | 21.8<br>8 | 21.8<br>9 | NaN       | NaN       | NaN       | 22.<br>35 | 22.<br>74 | 22.<br>15 | 22.<br>48 | NaN       | 22.20 | DEPC/72.02                | K   | 68          | SILuMAb-<br>LC |
| 24.1<br>7 | 24.5<br>6 | 23.7<br>3 | 23.7<br>2 | 24.2<br>3 | 24.5<br>4 | 24.<br>07 | 24.<br>07 | 24.<br>38 | 24.<br>36 | 24.1<br>9 | 24.17 | DEPC/72.02                | K   | 116         | SILuMAb-<br>LC |
| NaN       | NaN       | 21.6<br>1 | 21.5<br>1 | 22.2<br>7 | 21.4<br>8 | 22.<br>66 | 22.<br>64 | Na<br>N   | 21.<br>98 | 21.7<br>4 | 21.60 | DEPC/72.02                | K   | 135         | SILuMAb-<br>LC |
| NaN       | NaN       | 20.3<br>1 | 20.3<br>4 | 20.6<br>5 | NaN       | 20.<br>70 | 20.<br>79 | 20.<br>61 | 20.<br>61 | 20.5<br>4 | 20.43 | DEPC/72.02                | K   | 155         | SILuMAb-<br>LC |
| 23.6<br>8 | 23.6<br>9 | 23.5<br>9 | 23.6<br>2 | 24.0<br>8 | 24.0<br>8 | 23.<br>87 | 23.<br>89 | 23.<br>88 | 23.<br>87 | 24.3<br>5 | 24.35 | DEPC/72.02                | K   | 162         | SILuMAb-<br>LC |
| 22.2<br>7 | 22.2<br>6 | 22.1<br>1 | 22.2<br>1 | 22.6<br>3 | 21.6<br>3 | 23.<br>11 | 23.<br>10 | 23.<br>25 | 23.<br>25 | 23.1<br>6 | 23.24 | DEPC/72.02                | K   | 177         | SILuMAb-<br>LC |
| 23.7<br>3 | 23.7<br>0 | 23.9<br>3 | 23.5<br>4 | 24.0<br>4 | 24.0<br>7 | 24.<br>48 | 24.<br>14 | 24.<br>04 | 24.<br>36 | 24.4<br>2 | 24.42 | DEPC/72.02                | K   | 192         | SILuMAb-<br>LC |
| 23.7<br>4 | 23.7<br>5 | 23.3<br>8 | 23.3<br>6 | 23.8<br>2 | 23.7<br>8 | 23.<br>80 | 23.<br>82 | 23.<br>99 | 23.<br>98 | 24.1<br>5 | 24.15 | DEPC/72.02                | K   | 210         | SILuMAb-<br>LC |
| NaN       | NaN       | 20.0<br>0 | 20.0<br>4 | 20.3<br>6 | 20.4<br>4 | 19.<br>97 | 20.<br>04 | 20.<br>70 | 21.<br>41 | 22.2<br>3 | 21.74 | DEPC/72.02                | K   | 218         | SILuMAb-<br>HC |
| 21.2<br>2 | 21.2<br>3 | 23.6<br>0 | 20.8<br>9 | 23.9<br>4 | 20.2<br>7 | 24.<br>40 | 24.<br>44 | 24.<br>32 | 24.<br>38 | 24.2<br>5 | 24.42 | DEPC/72.02                | Y   | 32          | SILuMAb-<br>LC |
| 24.8<br>6 | 20.5<br>3 | 24.5<br>6 | 24.5<br>7 | 20.8<br>4 | 25.2<br>1 | 25.<br>30 | 21.<br>49 | 25.<br>43 | 21.<br>44 | 21.4<br>2 | 25.34 | DEPC/72.02                | Y   | 38          | SILuMAb-<br>LC |
| 23.1<br>5 | 23.1<br>4 | 23.5<br>0 | 23.4<br>9 | 23.6<br>6 | 23.6<br>6 | 23.<br>73 | 24.<br>11 | 24.<br>30 | 24.<br>30 | 24.0<br>0 | 24.43 | DEPC/72.02                | Y   | 51          | SILuMAb-<br>LC |
| 22.6<br>5 | 22.5<br>9 | 22.6<br>4 | 22.6<br>4 | 22.0<br>9 | 22.3<br>9 | 22.<br>04 | 22.<br>01 | 21.<br>83 | 22.<br>17 | 22.9<br>2 | 22.85 | DEPC/72.02;<br>DEPC/72.02 | H,K | 314,<br>321 | SILuMAb-<br>HC |
| 22.4<br>6 | NaN       | 22.3<br>4 | NaN       | 23.1<br>8 | 21.1<br>5 | 21.<br>67 | 22.<br>83 | 22.<br>75 | Na<br>N   | NaN       | 21.27 | DEPC/72.02;<br>DEPC/72.02 | H,K | 314,<br>324 | SILuMAb-<br>HC |

|           |           |           |           |           |           |           |           |           |           |           |       |                           |     |             |                |
|-----------|-----------|-----------|-----------|-----------|-----------|-----------|-----------|-----------|-----------|-----------|-------|---------------------------|-----|-------------|----------------|
| 22.8<br>1 | 21.8<br>8 | 22.9<br>8 | 22.3<br>6 | 22.0<br>0 | 24.3<br>1 | 22.<br>46 | 23.<br>84 | 23.<br>66 | 23.<br>34 | 24.1<br>0 | 23.56 | DEPC/72.02;<br>DEPC/72.02 | H,Y | 433,<br>440 | SILuMAb-<br>HC |
| 21.7<br>6 | 21.3<br>4 | 20.1<br>0 | NaN       | 20.4<br>4 | 24.1<br>0 | 24.<br>30 | 20.<br>51 | Na<br>N   | 22.<br>48 | 23.1<br>3 | NaN   | DEPC/72.02;<br>DEPC/72.02 | H,Y | 437,<br>440 | SILuMAb-<br>HC |
| 22.0<br>2 | 22.4<br>9 | NaN       | NaN       | 22.4<br>2 | 24.2<br>8 | 22.<br>21 | Na<br>N   | 22.<br>01 | 24.<br>47 | 24.4<br>6 | NaN   | DEPC/72.02;<br>DEPC/72.02 | H,Y | 439,<br>440 | SILuMAb-<br>HC |
| 22.1<br>9 | 22.2<br>0 | 22.6<br>2 | 21.7<br>7 | 22.6<br>6 | 22.6<br>4 | 22.<br>74 | 22.<br>77 | 22.<br>77 | 22.<br>76 | 22.3<br>9 | 22.42 | DEPC/72.02;<br>DEPC/72.02 | K,S | 43,4<br>9   | SILuMAb-<br>HC |
| 24.5<br>5 | 24.5<br>2 | 24.9<br>8 | 24.2<br>0 | 22.9<br>2 | NaN       | 25.<br>20 | 24.<br>75 | 25.<br>26 | 25.<br>24 | 24.5<br>6 | 25.69 | DEPC/72.02;<br>DEPC/72.02 | K,S | 50,6<br>2   | SILuMAb-<br>HC |
| 20.8<br>1 | 22.5<br>4 | 21.3<br>0 | 21.2<br>9 | 21.7<br>8 | 21.7<br>8 | 22.<br>94 | 21.<br>79 | 22.<br>09 | Na<br>N   | 22.8<br>4 | 22.13 | DEPC/72.02;<br>DEPC/72.02 | K,S | 324,<br>328 | SILuMAb-<br>HC |
| 25.5<br>2 | 25.5<br>2 | 24.5<br>4 | 25.2<br>6 | 25.4<br>8 | 24.7<br>6 | 25.<br>41 | 25.<br>42 | 25.<br>50 | Na<br>N   | 25.4<br>8 | 25.94 | DEPC/72.02;<br>DEPC/72.02 | K,S | 338,<br>341 | SILuMAb-<br>HC |
| 21.7<br>1 | 21.6<br>7 | 21.8<br>2 | 21.8<br>3 | 22.1<br>8 | 22.1<br>1 | 21.<br>90 | 21.<br>89 | 21.<br>91 | 21.<br>92 | 21.9<br>7 | 21.96 | DEPC/72.02;<br>DEPC/72.02 | K,S | 418,<br>419 | SILuMAb-<br>HC |
| 21.5<br>3 | 21.3<br>8 | 21.1<br>3 | 20.9<br>3 | 22.1<br>5 | 22.0<br>1 | 21.<br>77 | 21.<br>98 | 21.<br>85 | 21.<br>61 | 21.3<br>3 | 21.49 | DEPC/72.02;<br>DEPC/72.02 | K,T | 250,<br>254 | SILuMAb-<br>HC |
| 22.6<br>7 | 22.6<br>9 | 22.9<br>9 | 23.0<br>1 | 22.5<br>9 | 23.0<br>3 | 23.<br>13 | 23.<br>40 | 23.<br>58 | 23.<br>56 | 23.5<br>4 | 22.76 | DEPC/72.02;<br>DEPC/72.02 | K,T | 330,<br>339 | SILuMAb-<br>HC |
| 22.1<br>4 | 22.1<br>6 | 21.8<br>2 | 21.8<br>3 | 22.4<br>2 | 22.4<br>0 | 21.<br>56 | 21.<br>95 | 22.<br>10 | 21.<br>77 | 21.4<br>0 | 21.37 | DEPC/72.02;<br>DEPC/72.02 | K,Y | 75,7<br>9   | SILuMAb-<br>HC |
| 21.0<br>2 | 21.0<br>0 | 20.9<br>7 | 20.9<br>3 | 21.8<br>5 | 21.8<br>2 | 21.<br>39 | 21.<br>38 | 21.<br>19 | 21.<br>22 | 21.3<br>6 | 21.33 | DEPC/72.02;<br>DEPC/72.02 | K,Y | 321,<br>323 | SILuMAb-<br>HC |
| 20.5<br>4 | 20.5<br>5 | 20.6<br>4 | 20.6<br>6 | 20.9<br>4 | 20.9<br>6 | Na<br>N   | 20.<br>31 | 20.<br>77 | 20.<br>74 | 20.2<br>1 | 20.59 | DEPC/72.02;<br>DEPC/72.02 | S,K | 223,<br>226 | SILuMAb-<br>HC |
| 24.4<br>4 | 24.4<br>4 | 24.4<br>2 | 24.4<br>0 | 24.7<br>6 | 24.7<br>6 | 24.<br>38 | 24.<br>38 | 24.<br>50 | 24.<br>50 | 24.5<br>5 | 24.56 | DEPC/72.02;<br>DEPC/72.02 | S,K | 341,<br>344 | SILuMAb-<br>HC |
| 20.5<br>7 | 20.5<br>6 | NaN       | 20.4<br>8 | 21.3<br>3 | 21.8<br>9 | 21.<br>52 | 21.<br>47 | 21.<br>54 | 21.<br>48 | 21.3<br>3 | 21.24 | DEPC/72.02;<br>DEPC/72.02 | Y,K | 323,<br>324 | SILuMAb-<br>HC |
| 22.3<br>1 | 22.3<br>9 | NaN       | 22.1<br>6 | 22.8<br>2 | 22.8<br>5 | 22.<br>94 | 22.<br>98 | 22.<br>86 | 22.<br>85 | 23.3<br>1 | 22.50 | DEPC/72.02;<br>DEPC/72.02 | Y,K | 323,<br>326 | SILuMAb-<br>HC |

|           |           |           |           |           |           |           |           |           |           |           |       |                           |     |             |                |
|-----------|-----------|-----------|-----------|-----------|-----------|-----------|-----------|-----------|-----------|-----------|-------|---------------------------|-----|-------------|----------------|
| 23.3<br>6 | 21.8<br>3 | 22.9<br>7 | 22.9<br>9 | 23.4<br>9 | 23.4<br>8 | 22.<br>28 | 24.<br>34 | 23.<br>58 | 23.<br>53 | 23.3<br>6 | 23.33 | DEPC/72.02;<br>DEPC/72.02 | H,K | 41,4<br>4   | SILuMAb-<br>LC |
| 20.9<br>3 | 21.3<br>9 | NaN       | NaN       | NaN       | 21.8<br>0 | 21.<br>95 | 21.<br>98 | Na<br>N   | 20.<br>99 | 20.6<br>9 | 21.07 | DEPC/72.02;<br>DEPC/72.02 | H,K | 41,4<br>7   | SILuMAb-<br>LC |
| NaN       | NaN       | 22.8<br>8 | 22.8<br>3 | 23.3<br>5 | 23.2<br>0 | 23.<br>50 | Na<br>N   | 22.<br>95 | 22.<br>94 | 22.7<br>4 | 22.70 | DEPC/72.02;<br>DEPC/72.02 | K,H | 192,<br>194 | SILuMAb-<br>LC |
| 22.3<br>3 | NaN       | 22.3<br>2 | NaN       | 22.8<br>1 | NaN       | Na<br>N   | 22.<br>13 | Na<br>N   | 22.<br>41 | 22.3<br>7 | NaN   | DEPC/72.02;<br>DEPC/72.02 | K,S | 47,5<br>8   | SILuMAb-<br>LC |
| 22.7<br>1 | 22.7<br>9 | 21.9<br>4 | 22.5<br>5 | 22.4<br>5 | 23.2<br>7 | 22.<br>65 | 22.<br>68 | 22.<br>90 | 22.<br>68 | 22.7<br>1 | 23.37 | DEPC/72.02;<br>DEPC/72.02 | K,S | 162,<br>171 | SILuMAb-<br>LC |
| 24.0<br>9 | 24.8<br>2 | 24.5<br>7 | 22.5<br>8 | 25.0<br>8 | 24.3<br>9 | 24.<br>97 | 24.<br>19 | 23.<br>86 | 24.<br>39 | 24.5<br>5 | 24.31 | DEPC/72.02;<br>DEPC/72.02 | K,S | 177,<br>193 | SILuMAb-<br>LC |
| 21.7<br>4 | NaN       | 22.3<br>2 | 22.3<br>3 | 22.8<br>1 | 22.7<br>2 | 22.<br>14 | 22.<br>13 | Na<br>N   | 22.<br>41 | 22.3<br>7 | 22.34 | DEPC/72.02;<br>DEPC/72.02 | K,T | 47,5<br>4   | SILuMAb-<br>LC |
| 20.6<br>3 | 20.6<br>9 | 20.5<br>3 | NaN       | 21.8<br>4 | 21.2<br>4 | 21.<br>27 | 21.<br>98 | 21.<br>40 | 21.<br>62 | NaN       | 21.07 | DEPC/72.02;<br>DEPC/72.02 | K,Y | 44,5<br>1   | SILuMAb-<br>LC |
| 21.5<br>2 | 21.5<br>2 | 21.3<br>0 | 21.6<br>5 | 22.0<br>5 | 21.4<br>5 | 22.<br>11 | 22.<br>08 | 22.<br>30 | 21.<br>61 | 21.5<br>0 | 22.26 | DEPC/72.02;<br>DEPC/72.02 | K,Y | 47,5<br>1   | SILuMAb-<br>LC |
| 20.8<br>7 | NaN       | 20.6<br>4 | NaN       | 21.2<br>5 | NaN       | 21.<br>22 | 21.<br>19 | 21.<br>25 | Na<br>N   | 21.1<br>0 | 21.05 | DEPC/72.02;<br>DEPC/72.02 | K,Y | 177,<br>178 | SILuMAb-<br>LC |
| 21.9<br>9 | 22.0<br>2 | 21.5<br>6 | NaN       | NaN       | 22.1<br>6 | Na<br>N   | 22.<br>22 | Na<br>N   | 22.<br>12 | 21.9<br>2 | 21.96 | DEPC/72.02;<br>DEPC/72.02 | S,K | 36,4<br>4   | SILuMAb-<br>LC |
| 20.0<br>8 | NaN       | 20.5<br>0 | 20.4<br>7 | NaN       | NaN       | Na<br>N   | 21.<br>32 | 21.<br>48 | 22.<br>41 | 22.8<br>6 | 22.77 | DEPC/72.02;<br>DEPC/72.02 | S,K | 158,<br>162 | SILuMAb-<br>LC |
| NaN       | 21.2<br>7 | 21.0<br>6 | 20.9<br>9 | NaN       | NaN       | 21.<br>81 | Na<br>N   | 21.<br>86 | 21.<br>86 | NaN       | 20.52 | DEPC/72.02;<br>DEPC/72.02 | S,K | 185,<br>192 | SILuMAb-<br>LC |
| 20.5<br>5 | 20.4<br>8 | 21.3<br>6 | 21.2<br>2 | 21.1<br>0 | 21.0<br>6 | 21.<br>56 | 21.<br>55 | 21.<br>91 | 22.<br>08 | 22.3<br>8 | 22.72 | DEPC/72.02;<br>DEPC/72.02 | T,K | 151,<br>162 | SILuMAb-<br>LC |
| 24.4<br>0 | 23.7<br>0 | 23.3<br>4 | 24.0<br>1 | 23.8<br>3 | 23.8<br>3 | 24.<br>65 | 23.<br>90 | 24.<br>56 | 23.<br>75 | 23.6<br>1 | 23.58 | DEPC/72.02;<br>DEPC/72.02 | Y,K | 32,4<br>4   | SILuMAb-<br>LC |
| 23.7<br>0 | 23.7<br>0 | 23.3<br>4 | 23.3<br>5 | NaN       | 23.8<br>3 | Na<br>N   | 23.<br>21 | 23.<br>79 | 23.<br>75 | 23.6<br>1 | 23.58 | DEPC/72.02;<br>DEPC/72.02 | Y,K | 38,4<br>4   | SILuMAb-<br>LC |

|           |           |           |           |           |           |           |           |           |           |           |       |                                                     |     |             |                |
|-----------|-----------|-----------|-----------|-----------|-----------|-----------|-----------|-----------|-----------|-----------|-------|-----------------------------------------------------|-----|-------------|----------------|
| 22.6<br>3 | NaN       | 22.5<br>1 | 22.5<br>0 | 22.9<br>4 | 22.9<br>1 | 22.<br>65 | 22.<br>68 | 22.<br>93 | 22.<br>91 | 22.9<br>3 | 22.13 | DEPC/72.02;<br>DEPC/72.02                           | Y,K | 51,5<br>5   | SILuMAb-<br>LC |
| 21.2<br>1 | 20.6<br>6 | 20.3<br>6 | 21.0<br>2 | 20.9<br>5 | NaN       | 21.<br>10 | Na<br>N   | Na<br>N   | 21.<br>20 | 21.8<br>7 | 21.13 | DEPC/72.02;<br>DEPC/72.02                           | Y,K | 178,<br>192 | SILuMAb-<br>LC |
| 21.2<br>1 | NaN       | 23.2<br>2 | 23.6<br>2 | 24.1<br>9 | 23.8<br>8 | 23.<br>49 | 23.<br>48 | 24.<br>32 | 23.<br>77 | 23.6<br>0 | NaN   | DEPC/72.02;<br>DEPC/72.02                           | Y,K | 183,<br>192 | SILuMAb-<br>LC |
| 23.1<br>0 | 23.4<br>6 | 23.0<br>7 | 23.0<br>7 | 23.4<br>6 | 23.3<br>8 | 23.<br>64 | 23.<br>64 | 23.<br>62 | 23.<br>98 | 22.9<br>1 | 22.90 | DEPC/72.02;<br>Oxidation/15.<br>99                  | K,M | 75,8<br>2   | SILuMAb-<br>HC |
| NaN       | 21.1<br>4 | 20.9<br>5 | 20.9<br>6 | NaN       | 21.3<br>8 | Na<br>N   | 20.<br>99 | 21.<br>03 | 21.<br>32 | NaN       | 20.47 | DEPC/72.02;<br>Oxidation/15.<br>99                  | Y,M | 32,3<br>4   | SILuMAb-<br>HC |
| 20.8<br>4 | 20.8<br>9 | 21.0<br>7 | 20.9<br>8 | 21.3<br>0 | 20.8<br>6 | 21.<br>82 | 21.<br>82 | 21.<br>94 | 21.<br>96 | 21.4<br>4 | 21.43 | DEPC/72.02;<br>Oxidation/15.<br>99                  | K,M | 47,4<br>9   | SILuMAb-<br>LC |
| 21.5<br>8 | NaN       | NaN       | 23.8<br>3 | NaN       | 24.3<br>1 | Na<br>N   | 23.<br>98 | 25.<br>57 | 23.<br>98 | NaN       | 24.83 | DEPC/72.02;<br>urethane-CEt<br>histidine/134.<br>06 | H,H | 433,<br>437 | SILuMAb-<br>HC |
| 24.1<br>3 | 23.3<br>4 | 23.9<br>4 | 23.0<br>9 | 23.6<br>0 | 24.4<br>1 | 24.<br>02 | 24.<br>85 | 24.<br>67 | 23.<br>25 | 24.0<br>2 | 25.53 | DEPC/72.02;<br>urethane-CEt<br>histidine/134.<br>06 | H,H | 433,<br>439 | SILuMAb-<br>HC |
| NaN       | NaN       | 24.0<br>4 | 23.7<br>4 | 25.2<br>6 | NaN       | Na<br>N   | Na<br>N   | Na<br>N   | 23.<br>78 | 25.2<br>4 | 24.83 | DEPC/72.02;<br>urethane-CEt<br>histidine/134.<br>06 | H,H | 437,<br>439 | SILuMAb-<br>HC |
| NaN       | 20.4<br>9 | 20.4<br>8 | 20.4<br>2 | 20.7<br>6 | NaN       | Na<br>N   | 20.<br>22 | Na<br>N   | 21.<br>16 | 20.3<br>8 | 20.36 | DEPC/72.02;<br>urethane-CEt<br>histidine/134.<br>06 | K,H | 226,<br>228 | SILuMAb-<br>HC |
| 22.8<br>4 | 22.8<br>1 | 22.7<br>4 | 22.7<br>5 | 23.1<br>5 | 24.1<br>7 | 23.<br>05 | Na<br>N   | 23.<br>16 | 23.<br>15 | 23.2<br>4 | 23.24 | DEPC/72.02;<br>urethane-CEt                         | S,H | 430,<br>439 | SILuMAb-<br>HC |

|       |       |       |       |       |       |       |       |       |       |       |       |                                                          |       |             |            |
|-------|-------|-------|-------|-------|-------|-------|-------|-------|-------|-------|-------|----------------------------------------------------------|-------|-------------|------------|
|       |       |       |       |       |       |       |       |       |       |       |       | histidine/134.06                                         |       |             |            |
| 22.42 | 21.68 | 21.23 | 21.90 | 22.10 | 21.96 | 21.38 | NaN   | 21.15 | 21.08 | 20.68 | 20.58 | DEPC/72.02; urethane-CEt histidine/134.06;DEPC/72.02     | H,H,Y | 433,439,440 | SILuMAb-HC |
| 20.44 | 20.47 | 20.60 | NaN   | 20.92 | 20.85 | 20.39 | 20.46 | 20.40 | 20.33 | 20.44 | 20.36 | Gln->pyro-Glu/-17.02;DEPC/72.02                          | Q,S   | 1,2         | SILuMAb-LC |
| 22.01 | 22.03 | 22.66 | 21.97 | 22.52 | 22.06 | 22.71 | 23.16 | 22.69 | 22.67 | 22.77 | 23.86 | Oxidation/15.99;DEPC/72.02                               | H,K   | 228,252     | SILuMAb-HC |
| 20.23 | 20.27 | 20.11 | NaN   | NaN   | 20.49 | 21.22 | 21.22 | 20.97 | 20.98 | 20.45 | 20.38 | Oxidation/15.99;DEPC/72.02                               | M,K   | 116,125     | SILuMAb-HC |
| NaN   | 22.02 | 21.80 | 21.79 | 21.69 | 22.36 | 21.91 | 21.92 | 22.20 | 22.20 | 21.81 | 21.79 | Oxidation/15.99;DEPC/72.02                               | M,K   | 49,55       | SILuMAb-LC |
| 21.78 | 21.80 | 21.96 | 21.98 | 22.15 | 22.24 | 22.23 | 21.96 | 22.42 | 22.02 | 21.98 | 21.61 | Oxidation/15.99;DEPC/72.02                               | M,Y   | 49,51       | SILuMAb-LC |
| 21.21 | 21.21 | 20.86 | NaN   | NaN   | 20.69 | 22.10 | 22.13 | 21.77 | NaN   | NaN   | 21.19 | Oxidation/15.99;DEPC/72.02                               | W,K   | 37,44       | SILuMAb-LC |
| 22.90 | 22.78 | 21.15 | 22.66 | 21.24 | 21.24 | 21.18 | 21.11 | 21.19 | 21.19 | 20.80 | 20.81 | Oxidation/15.99;DEPC/72.02;urethane-CEt histidine/134.06 | M,H,H | 432,433,439 | SILuMAb-HC |



|       |       |       |       |       |       |       |       |       |       |       |       |                                          |     |         |            |
|-------|-------|-------|-------|-------|-------|-------|-------|-------|-------|-------|-------|------------------------------------------|-----|---------|------------|
| 20.08 | 20.18 | 20.76 | 20.02 | 20.56 | 21.04 | 20.76 | 20.92 | 20.98 | 20.96 | 20.97 | 20.93 | urethane-CEt histidine/134.06;DEPC/72.02 | H,K | 228,250 | SILuMAb-HC |
| 21.36 | 21.39 | NaN   | NaN   | NaN   | 21.84 | 22.39 | 22.40 | 22.25 | 22.25 | 22.34 | 20.04 | urethane-CEt histidine/134.06;DEPC/72.02 | H,K | 228,252 | SILuMAb-HC |
| 20.44 | 20.42 | 20.70 | 20.22 | 21.23 | 20.76 | 21.17 | 21.22 | NaN   | 21.05 | NaN   | 21.13 | urethane-CEt histidine/134.06;DEPC/72.02 | H,K | 314,321 | SILuMAb-HC |
| 20.24 | 20.19 | NaN   | NaN   | 20.76 | NaN   | 21.62 | 21.59 | 21.29 | 21.27 | 21.24 | 21.15 | urethane-CEt histidine/134.06;DEPC/72.02 | H,K | 314,324 | SILuMAb-HC |
| 22.84 | NaN   | 22.74 | 22.75 | 23.15 | 24.50 | 23.04 | 23.06 | NaN   | 24.11 | 23.24 | 22.47 | urethane-CEt histidine/134.06;DEPC/72.02 | H,T | 437,441 | SILuMAb-HC |
| 23.78 | 24.42 | 22.80 | 22.63 | 24.17 | 23.28 | NaN   | 23.62 | NaN   | 24.30 | 24.17 | 22.87 | urethane-CEt histidine/134.06;DEPC/72.02 | H,Y | 437,440 | SILuMAb-HC |
| NaN   | 23.88 | 24.26 | 23.74 | 24.21 | 24.20 | NaN   | 23.72 | 23.80 | 23.78 | 23.76 | 23.75 | urethane-CEt histidine/134.06;DEPC/72.02 | H,Y | 439,440 | SILuMAb-HC |
| 22.04 | 22.01 | 21.28 | 21.17 | 21.94 | 21.99 | 21.41 | 21.45 | 21.90 | 21.88 | 21.50 | 21.50 | urethane-CEt histidine/134.06;DEPC/72.02 | H,K | 41,44   | SILuMAb-LC |

|           |           |           |     |           |           |           |           |           |           |           |       |                                                                    |           |                     |                |
|-----------|-----------|-----------|-----|-----------|-----------|-----------|-----------|-----------|-----------|-----------|-------|--------------------------------------------------------------------|-----------|---------------------|----------------|
| 22.0<br>3 | 22.0<br>7 | 21.3<br>9 | NaN | 22.3<br>3 | 21.2<br>1 | 22.<br>55 | 22.<br>56 | 22.<br>18 | 22.<br>20 | 21.9<br>0 | 21.88 | urethane-CEt<br>histidine/134.<br>06;DEPC/72.<br>02;DEPC/72.<br>02 | H,K,<br>T | 228,<br>250,<br>254 | SILuMAb-<br>HC |
|-----------|-----------|-----------|-----|-----------|-----------|-----------|-----------|-----------|-----------|-----------|-------|--------------------------------------------------------------------|-----------|---------------------|----------------|

*Table S3: Percentage DEPC incorporation at Cys for assessing the intactness of disulfide bonds in long term stored (S\_2yr, S\_1yr) and fresh SILuMAb- each with 3 replicates.*

| SILuMAb<br>-HC | Cys<br>position | S_2yr<br>(1) | S_2yr<br>(2) | S_2yr<br>(3) | S_2yr<br>(4) | S_1yr<br>(1) | S_1yr<br>(2) | S_1yr<br>(3) | S_1yr<br>(4) | S_0yr<br>(1) | S_0yr<br>(2) | S_0yr<br>(3) | S_0yr<br>(4) |
|----------------|-----------------|--------------|--------------|--------------|--------------|--------------|--------------|--------------|--------------|--------------|--------------|--------------|--------------|
|                | 22              | 1.46         |              |              | 1.4          | 2.14         |              |              |              |              |              |              |              |
|                | 95              | 2.29         | 2.55         | 2.41         | 2.09         | 2.94         | 2.95         |              |              |              |              |              |              |
|                | 148             | 15           | 15.2         | 14.7         | 14.6         | 16.6         | 16.9         | 18.4         | 19.1         |              | 33.9         |              |              |
|                | 230             |              | 14.7         | 13.9         | 14.1         |              | 16.5         |              |              |              |              |              |              |
|                | 233             | 14.7         | 15.2         | 13.9         | 14           | 18.1         | 16.5         |              | 20.6         |              |              |              |              |
|                | 265             | 8.55         | 4.39         | 4.55         | 4.73         | 7.33         | 4.96         | 6.3          | 10.1         |              |              |              |              |
|                | 429             |              |              |              | 23.7         | 25.9         |              | 28.2         | 26.2         |              |              |              |              |
| SILuMAb<br>-LC | 199             | 30.6         | 21.2         | 21.4         | 16.2         | 21.8         | 16.3         | 64.4         | 66.8         |              |              |              |              |

*Supporting method 1: Peptide cleanup using C18 stagetips:*

In brief, two layers of C18 solid phase extraction material were manually tightly filled into 100 µL pipette tips. The C18 material was activated with 100 µL methanol and then 100 µL 0.1% FA in 80% ACN. The tips were centrifuged after each step at 2000 x g for 2 min or until the solutions completely passed through the C18 phase. For equilibration, the tips were washed with 100 µL 0.1% FA in water (twice), and liquid was drained by centrifugation. Next, 200 µL of tryptic digest was added at a time to the prepared tips and centrifuged until the whole sample was loaded. StageTips were washed twice with 100 µL 0.1% FA water. The C18 disk-bound tryptic peptides were eluted with 100 µL of 0.1% FA in 80% ACN.

#### *Supporting method 2: Detailed method for LC-MS based tryptic peptide analysis*

Mobile phase A consisted of 0.1% FA in water, mobile phase B of 0.1% FA in ACN. Column oven temperature was set to 40 °C and flow rate was 12 µL/min. The gradient (total time 45 min) was as follows: 2 min 5% B, then within 30 min up to 40% B, then up to 90% B within 1 min, keeping it for 4 min at 90% B, and finally down to 5% B within 1 min. The column is re-equilibrated for 7 min at 5% B. For the ESI source, end plate offset was 500 V, capillary offset 4500 V, nebulizer gas flow 0.7 bar, dry gas flow 6L/min, and dry temp 200 °C. Auto MS/MS scan mode was applied with the following parameters: cycle time 2s, threshold per 1000, sum 500 cts, fixed MS/MS acquisition 0.68 s. For each sample, two technical replicates were recorded.

#### *Supporting method 3: Detailed method for LC-MS based intact protein mass analysis*

Mobile phase A consisted of 0.1% FA in water, mobile phase B of 0.1% FA in ACN. Column oven temperature was set to 80 °C and flow rate was 0.35 mL/min. The gradient was as follows: 20% B at 4 min, 40% B at 5min, 70% B at 10 min, 90% B at 11 min, 20% B at 12 min, 20% B at 15 min. For the ESI source, end plate offset was 500 V, capillary offset 4500 V, nebulizer gas flow 3 bar, dry gas flow 12 L/min, and dry temp. 300 °C and in-source CID 120 eV

#### *Supporting method 4: Detailed data analysis method for quantification of peptides from LC-MS/MS data*

Data analysis was performed in Byos software from Protein metrics. For identification of peptides, the modification list included carbamidomethylation (57 Da) as fixed modification in most experiments. Only for the long-storage experiment, carbamidomethylation was set to variable modification. Otherwise, common variable modifications included pyroglutamate formation at the protein N terminus (-17.02 Da), oxidation (15.99 Da) at Met, carbethoxy modification with DEPC reagent (72.02 Da) at His, Lys, Cys, Ser, Thr, and Tyr. Neutral losses of DEPC from Lys and His (46.04 Da) or neutral loss from Ser and Thr (90.03 Da), were set as rare variable modifications. To allow maximum identification of DEPC modified peptides, other rare modifications considered were urethane carbethoxy histidine (134.06 Da), formyl carbethoxy histidine (162.05 Da) and di- carbethoxy histidine (146.06 Da). A total of four modifications (two of common and two of rare modifications) were allowed per peptide. Results were filtered to only include peptides with 2-7 charges, a peptide score of >150, delta modification score >10 and extracted ion chromatogram (XIC) area >3e5.
